# Supplementary material
Source: publisher figshare collection journal article supplement (https://karger.figshare.com/ndownloader/files/12738767)
Supplement: Supplementary file 1 [file 12738767]

**Supplementary Information**

**iNEO Contributors**

**ANZNN (Australia and New Zealand Neonatal Network):** Ross Haslam* Chair of the Executive Committee; Flinders Medical Centre, SA: Peter Marshall. Gold Coast University Hospital, QLD: Peter Schmidt. Gosford District Hospital, NSW: Adam Buckmaster*. John Hunter Children’s Hospital, NSW: Paul Craven, Koert de Waal*. King Edward Memorial and Princess Margaret Hospitals, WA: Karen Simmer, Andy Gill*, Jane Pillow*. Liverpool Hospital, NSW: Jacqueline Stack. Mater Mothers' Hospital, QLD: Lucy Cooke. Mercy Hospital for Women, VIC: Dan Casalaz, Jim Holberton*. Monash Medical Centre, VIC: Charles Barfield. Nepean Hospital, NSW: Lyn Downe, Vijay Shingde. Newborn Emergency Transport Service (VIC): Michael Stewart. NSW Pregnancy and Newborn Services Network: Barbara Bajuk*. NSW Newborn & Paediatric Emergency Transport Service: Andrew Berry. Royal Children's Hospital, VIC: Rod Hunt. Royal Darwin Hospital, NT: Charles Kilburn. Royal Hobart Hospital, Tasmania: Tony De Paoli. Royal Hospital for Women, NSW: Kei Lui*. Royal North Shore Hospital, NSW: Mary Paradisis. Royal Prince Alfred Hospital, NSW: Ingrid Rieger, Shelley Reid*. Royal Brisbane and Women's Hospital, QLD: David Cartwright, Pieter Koorts. Royal Women's Hospital, VIC: Carl Kuschel, Lex Doyle. Sydney Children's Hospital, NSW: Andrew Numa. The Canberra Hospital, ACT: Hazel Carlisle. The Children's Hospital at Westmead, NSW: Nadia Badawi, Robert Halliday. The Townsville Hospital, QLD: Guan Koh*. Western Australia Neonatal Transport Service: Steven Resnick. Westmead Hospital, NSW: Melissa Luig. Women's & Children's Hospital, SA: Chad Andersen. National Perinatal Epidemiology and Statistics Unit, University of New South Wales: Georgina Chambers*. New Zealand: Christchurch Women's Hospital: Adrienne Lynn, Brian Darlow. Dunedin Hospital: Roland Broadbent*. Middlemore Hospital: Lindsay Mildenhall. Auckland City Hospital: Mariam Buksh, Malcolm Battin. North Shore and Waitakere Hospitals: Jutta van den Boom*. Waikato Hospital: David Bourchier, Lee Carpenter*. Wellington Women's Hospital: Vaughan Richardson. Singapore: KK Women's and Children's Hospital, Singapore: Victor Samuel Rajadurai*.

* denotes the ANZNN Executive Committee

**CNN (Canadian Neonatal Network):** Prakesh S Shah, MD, MSc (Director, Canadian Neonatal Network and site investigator), Mount Sinai Hospital, Toronto, Ontario; Adele Harrison, MD, MBChB, Victoria General Hospital, Victoria, British Columbia; Anne Synnes, MDCM, MHSC, and Joseph Ting, MD, B.C. Women’s Hospital and Health Centre, Vancouver, British Columbia; Zenon Cieslak, MD, Royal Columbian Hospital, New Westminster, British Columbia; Rebecca Sherlock, MD, Surrey Memorial Hospital, Surrey, British Columbia; Wendy Yee, MD, Foothills Medical Centre, Calgary, Alberta; Khalid Aziz, MBBS, MA, MEd, and Jennifer Toye, MD, Royal Alexandra Hospital, Edmonton, Alberta; Carlos Fajardo, MD, Alberta Children’s Hospital, Calgary, Alberta; Zarin Kalapesi, MD, Regina General Hospital, Regina, Saskatchewan; Koravangattu Sankaran, MD, MBBS, and Sibasis Daspal, MD, Royal University Hospital, Saskatoon, Saskatchewan; Mary Seshia, MBChB, Winnipeg Health Sciences Centre, Winnipeg, Manitoba; Ruben Alvaro, MD, St. Boniface General Hospital, Winnipeg, Manitoba; Amit Mukerji, MD, Hamilton Health Sciences Centre, Hamilton, Ontario; Orlando Da Silva, MD, MSc, London Health Sciences Centre, London, Ontario; Chuks Nwaesei, MD, Windsor Regional Hospital, Windsor, Ontario; Kyong-Soon Lee, MD, MSc, Hospital for Sick Children, Toronto, Ontario; Michael Dunn, MD, Sunnybrook Health Sciences Centre, Toronto, Ontario; Brigitte Lemyre, MD, Children’s Hospital of Eastern Ontario and Ottawa General Hospital, Ottawa, Ontario; Kimberly Dow, MD, Kingston General Hospital, Kingston, Ontario; Ermelinda Pelausa, MD, Jewish General Hospital, Montréal, Québec; Keith Barrington, MBChB, Hôpital Sainte-Justine, Montréal, Québec; Christine Drolet, MD, and Bruno Piedboeuf, MD, Centre Hospitalier Universitaire de Québec, Sainte Foy Québec; Martine Claveau, MSc, LLM, NNP, and Marc Beltempo, MD, McGill University Health Centre, Montréal, Québec; Valerie Bertelle, MD, and Edith Masse, MD, Centre Hospitalier Universitaire de Sherbrooke, Sherbrooke, Québec; Roderick Canning, MD, Moncton Hospital, Moncton, New Brunswick; Hala Makary, MD, Dr. Everett Chalmers Hospital, Fredericton, New Brunswick; Cecil Ojah, MBBS, and Luis Monterrosa, MD, Saint John Regional Hospital, Saint John, New Brunswick; Akhil Deshpandey, MBBS, MRCPI, Janeway Children’s Health and Rehabilitation Centre, St. John’s, Newfoundland; Jehier Afifi, MB BCh, MSc, IWK Health Centre, Halifax, Nova Scotia; Andrzej Kajetanowicz, MD, Cape Breton Regional Hospital, Sydney, Nova Scotia; Shoo K Lee, MBBS, PhD (Chairman, Canadian Neonatal Network), Mount Sinai Hospital, Toronto, Ontario.

**FinMBR (Finnish Medical Birth Register):** Sture Andersson, MD, Helsinki University Hospital, Helsinki; Liisa Lehtonen, MD, Turku University Hospital, Turku; Outi Tammela, MD, Tampere University Hospital, Tampere; Ulla Sankilampi, MD, Kuopio University Hospital, Kuopio; Timo Saarela, MD, Oulu University Hospital, Oulu.

**ILNN (Illinois Neonatal Network):** Preetha Prazad, MD, Advocate Children’s Hospital, Park Ridge, Illinois; Akihiko Noguchi, MD, SSM Cardinal Glennon/St. Mary’s Hospital, St. Louis MO; Kamlesh McWan, MD, Children’s Hospital of Illinois, Peoria, Illinois; Beau Button, MD, St John’s Hospital, Springfield, Illinois; William Stratton, MD, Carle Foundation Hospital, Urbana, Illinois; Aaron Hamvus, MD, Northwestern University Hospitals, Chicago, Illinois; Aarti Raghaven, MD, University Illinois Chicago Hospital, Chicago, Illinois; Matthew Derrick, MD, Evanston Northshore Hospital, Evanston, Illinois; Radley Hadley, MD, Advocate Illinois Masonic Hospital, Chicago, Illinois; Robert Covert, MD, Edward Hospital, Naperville, Illinois; Omar Lablanc, MD, John H. Stroger Cook County Hospital, Chicago, Illinois; Marc Weiss, MD, RMCH Loyola University Hospital, Maywood, Illinois; Anthony Bell, MD, Adventist Hinsdale Hospital, Hinsdale, Illinois; Maliha Shareef, MD, St. Alexius Hospital, Hoffman Estates, Illinois; Jean Silvestri, MD, Rush University Hospital, Chicago, Illinois.

**INN (Israel Neonatal Network):** Eli Heymann, MD, Assaf Harofeh Medical Center, Tzrifin; Shmuel Zangen, MD, Barzilai Medical Center, Ashkelon; Tatyana Smolkin, MD, Baruch Padeh Medical Center, Poriya; Francis Mimouni, MD, Bikur Cholim Hospital, Jerusalem; David Bader, MD, Bnai Zion Medical Center, Haifa; Avi Rothschild, MD, Carmel Medical Center, Haifa; Zipora Strauss, Chaim Sheba Medical Center, Ramat Gan; Clari Felszer, MD, Emek Medical Center, Afula; Hussam Omari, MD, French Saint Vincent de Paul Hospital, Nazareth; Smadar Even Tov-Friedman, MD, Hadassah University Hospital-Ein Karem, Jerusalem; Benjamin Bar-Oz, MD, Hadassah University Hospital-Har Hazofim, Jerusalem; Michael Feldman, MD, Hillel Yaffe Medical Center, Hadera; Nizar Saad, MD, Holy Family (Italian) Hospital, Nazareth; Orna Flidel-Rimon, MD, Kaplan Medical Center, Rehovot; Meir Weisbrod, MD, Laniado Hospital, Netanya; Daniel Lubin, MD, Mayanei Hayeshua Medical Center, Bnei Brak; Ita Litmanovitz, MD, Meir Medical Center, Kfar Saba; Amir Kugelman, MD, Rambam Medical Center; Eric Shinwell, MD, Rivka Ziv Medical Center, Safed; Gil Klinger, MD, Schneider Children’s Medical Center of Israel, Rabin Medical Center (Beilinson Campus), Petah Tikva; Yousif Nijim, MD, Scottish (EMMS) Hospital, Nazareth; Alona Bin-Nun, MD, Shaare-Zedek Medical Center, Jerusalem; Agneta Golan, MD, Soroka Medical Center, Beersheba; Dror Mandel, MD, Sourasky Medical Center, Tel Aviv; Vered Fleisher-Sheffer, MD,Western Galilee Medical Center, Nahariya; David Kohelet, MD, Wolfson Medical Center, Holon; Lev Bakhrakh, MD, Yoseftal Hospital, Eilat.

**NRNJ (Neonatal Research Network Japan):** Satoshi Hattori, MD, Sapporo City Hospital, Sapporo, Hokkaido; Masaru Shirai, MD, Asahikawa Kosei Hospital, Asahikawa, Hokkaido; Toru Ishioka, MD, Engaru Kosei Hospital, Engaru, Hokkaido; Toshihiko Mori, MD, NTT East Sappro Hospital, Sapporo, Hokkaido; Takasuke Amizuka, MD, Aomori Prefecture Central Hospital, Aomori, Aomori; Toru Huchimukai, MD, Iwate Prefecture Ohfunato Hospital, Ofunato, Iwate; Hiroshi Yoshida, MD, Tsuruoka City Shonai Hospital, Tsuruoka, Yamagata; Ayako Sasaki, MD, Yamagata University, Yamagata, Yamagata; Junichi Shimizu, MD, Tsuchiura Kyodo Hospital, Tsuchiura, Ibaraki; Toshihiko Nakamura, MD, National Nishisaitama Central Hospital, Tokorozawa, Saitama; Mami Maruyama, MD, Jichi Medical University Saitame Medical Center, Omiya, Saitama; Hiroshi Matsumoto, MD, Asahi Central Hospital, Asahi, Chiba; Shinichi Hosokawa, MD, National International Medical Center, Shinjuku, Tokyo; Atsuko Taki, MD, Tokyo Medical and Dental University, Bunkyo, Tokyo; Machiko Nakagawa, MD, Saint Luku Hospital, Chuo, Tokyo; Kyone Ko, MD, Sanikukai Hospital, Sumida, Tokyo; Azusa Uozumi, MD, Odawara City Hospital, Odawara, Kanagawa; Setsuko Nakata, MD, Iida City Hospital, Iida, Nagano; Akira Shimazaki, MD, National Shinshu Ueda Medical Center, Ueda, Nagano; Tatsuya Yoda, MD, Saku General Hospital, Saku, Nagano; Osamu Numata, MD, Nagaoka Red Cross Hospital, Nagaoka, Niigata; Hiroaki Imamura, MD, Koseiren Takaoka Hospital, Takaoka, Toyama; Azusa Kobayashi, MD, Kanazawa Medical University, Kanazawa, Kanazawa; Shuko Tokuriki, MD, Fukui University, Fukui, Fukui; Yasushi Uchida, MD, National Nagara Medical Center, Nagara, Gifu; Takahiro Arai, MD, Takayama Red Cross Hospital, Takayama, Gifu; Mitsuhiro Ito, MD, Fujieda City Hospital, Fujieda, Shizuoka; Kuniko Ieda, MD, Koritsu Tosei Hospital, Toyota, Aichi; Toshiyuki Ono, MD, Komaki City Hospital, Komaki, Aichi; Masashi Hayashi, MD, Okazaki City Hospital, Okazaki, Aichi; Kanemasa Maki, MD, Yokkaichi City Hospital, Yokkaichi, MieToru Yamakawa, MD, Japan Baptist Hospital, Kyoto, Kyoto; Masahiko Kawai, MD, Kyoto University, Kyoto, Kyoto; Noriko Fujii, MD, Fukuchiyama City Hospital, Fukuchiyama, Kyoto; Kozue Shiomi, MD, Kyoto City Hospital, Kyoto, Kyoto; Koji Nozaki, MD, Mitubishi Kyoto Hospital, Kyoto, Kyoto; Hiroshi Wada, MD, Yodogawa Christian Hospital, Osaka, Osaka; Taho Kim, MD, Osaka City Sumiyoshi Hospital, Osaka, Osaka; Yasuyuki Tokunaga, MD, Toyonaka City Hospital, Toyonaka, Osaka; , MD, National Cerebral and Cardiovascular Center, Suita, Osaka; Akihiro Takatera, MD, Chifune Hospital, Osaka, Osaka; Toshio Oshima, MD, Bell Land General Hospital, Sakai, Osaka; Hiroshi Sumida, MD, Rinku General Hospital, Izumisano, Osaka; Yae Michinomae, MD, Yao City Hospital, Yao, Osaka; Yoshio Kusumoto, MD, Osaka General Medical Center, Osaka, Osaka; Seiji Yoshimoto, MD, Kobe Children's Hospital, Kobe, Hyogo; Takeshi Morisawa, MD, Kakogawa City Hospital, Kakogawa, Hyogo; Tamaki Ohashi, MD, Hyogo Prefectural Awaji Hospital, Sumoto, Hyogo; Yukihiro Takahashi, MD, Nara Prefecture Medical University, Kashiwara, Nara; Moriharu Sugimoto, MD, Tsuyama Central Hospital, Tsuyama, Okayama; Noriaki Ono, MD, Hiroshima University, Hiroshima, Hiroshima; Shinichiro Miyagawa, MD, National Kure Medical Center, Kure, Hiroshima; Takahiko Saijo, MD, Tokushima University, Tokushima, Tokushima; Takashi Yamagami, MD, Tokushima City Hospital, Tokushima, Tokushima; Kosuke Koyano, MD, Kagawa University, Kida, Kagawa; Shoko Kobayashi, MD, Shikoku Medical Center for Children and Adults, Zentsuji, Kagawa; Takeshi Kanda, MD, National Kyushu Medical Center, Fukuoka, Fukuoka; Yoshihiro Sakemi, MD, National Kokura Medical Center, Kitakyushu, Fukuoka; Mikio Aoki, MD, National Nagasaki Medical Center, Nagasaki, Nagasaki; Koichi Iida, MD, Oita Prefectural Hospital, Oita, Oita; Mitsushi Goshi, MD, Nakatsu City Hospital, Nakatsu, Oita; Yuko Maruyama, MD, Imakyure General Hospital, Kagoshima, Kagoshima.

**SEN1500 (Spanish Neonatal Network):** Alejandro Avila-Alvarez, MD, and José Luis Fernandez-Trisac, MD, Complexo Hospitalario Universitario De A Coruña, A Coruña; Mª Luz Couce Pico, MD, and María José Fernández Seara, MD, Hospital Clínico Universitario de Santiago, Santiago de Compostela; Andrés Martínez Gutiérrez, MD, Complejo Hospitalario Albacete, Albacete; Carolina Vizcaíno , MD, Hospital General Universitario de Elche, Alicante; Miriam Salvador Iglesias, MD, and Honorio Sánchez Zaplana, MD, Hospital General Universitario de Alicante, Alicante; Belén Fernández Colomer, MD, and José Enrique García López, MD, Hospital Universitario Central de Asturias, Oviedo, Asturias; Rafael García Mozo, MD, and M. Teresa González Martínez, MD, Hospital Universitario de Cabueñes, Gijón, Asturias; Mª Dolores Muro Sebastián, MD, and Marta Balart Carbonell, MD, Clínica Corachán, Barcelona, ~~Barcelona~~; Joan Badia Barnusell, MD, and Mònica Domingo Puiggròs, MD, Corporacio Parc Taulí, Sabadell, Barcelona; Josep Figueras Aloy, MD, and Francesc Botet Mussons, MD, Hospital Clínic de Barcelona, Barcelona; Israel Anquela Sanz, MD, Hospitalario De Granollers, Granollers; Gemma Ginovart Galiana, MD, H. De La Santa Creu I Sant Pau, Barcelona; W. Coroleu, MD, Hospital Universitari Germans Trias I Pujol, Badalona; Martin Iriondo, MD, Hospital Sant Joan de Déu Barcelona, Esplugues de Llobregat, Barcelona; Laura Castells Vilella, MD, Hospital General de Cataluña, Barcelona; Roser Porta, MD, Institute Dexeus, Barcelona; Xavier Demestre, MD, and Silvia Martínez Nadal, MD, Scias-Hospital Barcelona, Barcelona; Cristina de Frutos Martínez, MD, Hospital Universitario de Burgos, Burgos; María Jesús López Cuesta, MD, H. San Pedro de Alcántara, Cáceres; Dolores Esquivel Mora, MD, and Joaquín Ortiz Tardío, MD, Hospital Jerez, Cádiz; Isabel Benavente, MD, and Almudena Alonso, MD, Hospital Universitario Puerta Del Mar, Cádiz; Ramón Aguilera Olmos, MD, Hospital General de Castellón, Castellón; Miguel A. García Cabezas, MD, and Mª Dolores Martínez Jiménez, MD, Hospital General Universitario de Ciudad Real, Ciudad Real; Mª Pilar Jaraba Caballero, MD, and Mª Dolores Ordoñez Díaz, MD, Hospital Universitario Reina Sofía, Córdoba; Alberto Trujillo Fagundo, MD, and Lluis Mayol Canals, MD, Hospital Universitari de Girona Dr. Josep Trueta, Girona; Fermín García-Muñoz Rodrigo, MD, and Lourdes Urquía Martí, MD, H.M.I. Las Palmas, Las Palmas, Gran Canaria; María Fernanda Moreno Galdo , MD, and José Antonio Hurtado Suazo, MD, Hospital Universitario Virgen De Las Nieves, Granada; Eduardo Narbona López, and José Uberos Fernández, MD, Hospital Universitario San Cecilio, Granada; Miguel A Cortajarena Altuna, MD, and Oihana Muga Zuriarrain Hospital, MD, Donostia, Gipuzkoa; David Mora Navarro, MD, Hospital Juan Ramón Jiménez, Huelva, ~~Huelva~~; María Teresa Domínguez, MD, Hospital Costa De La Luz, Huelva; Mª Yolanda Ruiz del Prado, MD, and Inés Esteban Díez, MD, Hospital San Pedro, Logroño, La Rioja; María Teresa Palau Benavides, MD, and Santiago Lapeña, MD, Hospital de León, León, León; Teresa Prada, MD, Hospital del Bierzo, Ponferrada, León; Eduard Soler Mir, MD, Hospital Arnau De Vilanova, Lleida; Araceli Corredera Sánchez, MD, Enrique Criado Vega, MD, Náyade del Prado, MD, and Cristina Fernández, MD, Hospital Clínico San Carlos, Madrid; Lucía Cabanillas Vilaplana, MD, and Irene Cuadrado Pérez, MD, Hospital Universitario De Getafe, Madrid; Luisa López Gómez, MD, Hospital De La Zarzuela, Madrid; Laura Domingo Comeche, MD, Hospital Universitario de Fuenlabrada, Fuenlabrada, Madrid; Isabel Llana Martín, MD, Hospital Madrid-Torrelodones, Madrid, Madrid; Carmen González Armengod, MD, and Carmen Muñoz Labián, MD, Hospital Universitario Puerta De Hierro, Majadahonda, Madrid; Mª José Santos Muñoz, MD, Hospital Severo Ochoa, Leganés, Madrid; Dorotea Blanco Bravo, MD, and Vicente Pérez, MD, Hospital Gregorio Marañón, Madrid; Mª Dolores Elorza Fernández, MD, Celia Díaz González, MD, and Susana Ares Segura, MD, H.U. La Paz, Madrid; Manuela López Azorín, MD, Hospital Universitario Quirónsalud Madrid, Madrid; Ana Belén Jimenez MD, Hospital Universitario Fundación Jiménez Díaz, Madrid; Tomás Sánchez-Tamayo, MD, and Elías Tapia Moreno, MD, Hospital Carlos Haya, Málaga; María González, MD, and José Enrique Sánchez Martínez, MD, Hospital Parque San Antonio De Málaga, Málaga; José María Lloreda García, MD, Hospital Universitario Santa Lucia De Cartagena, Murcia; Concepción Goñi Orayen, MD, Hospital Virgen Del Camino De Pamplona, Pamplona, Navarra; Javier Vilas González, MD, Complexo Hospitalario Pontevedra, Pontevedra; María Suárez Albo, MD, and Eva González Colmenero, MD, Hospital Xeral De Vigo, Pontevedra; Elena Pilar Gutiérrez González, MD, and Beatriz Vacas del Arco, MD, Hospital Universitario de Salamanca, Salamanca; Josefina Márquez Fernández, MD, and Laura Acosta Gordillo, MD, Hospital Valme, Sevilla; Mercedes Granero Asensio, MD, Hospital Virgen De La Macarena, Sevilla; Carmen Macías Díaz, MD, Hospital Universitario Virgen Del Rocío, Sevilla; Mar Albújar, MD, Hospital Universitari de Tarragona Joan XXIII, Tarragona; Pedro Fuster Jorge. MD, Hospital Universitario De Canarias, San Cristóbal de La Laguna, Santa Cruz de Tenerife; Sabina Romero, MD, and Mónica Rivero Falero, MD, Hospital Universitario Nuestra Señora De Candelaria, Santa Cruz de Tenerife; Ana Belén Escobar Izquierdo, Hospital Virgen De La Salud, Toledo; Javier Estañ Capell, MD, Hospital Clinico Universitario De Valencia, Valencia; Mª Isabel Izquierdo Macián, MD, Hospital Universitari La Fe, Valencia; Mª Mar Montejo Vicente, MD, and Raquel Izquierdo Caballero, MD, Hospital Universitario Río Hortega, Valladolid; Mª Mercedes Martínez, MD, and Aintzane Euba, MD, Hospital de Txagorritxu, Vitoria-Gasteiz; Amaya Rodríguez Serna, MD, and Juan María López de Heredia Goya, MD, Hospital de Cruces, Baracaldo; Alberto Pérez Legorburu, MD, and Ana Gutiérrez Amorós, MD, Hospital Universitario de Basurto, Bilbao; Víctor Manuel Marugán Isabel, MD, and Natalio Hernández González, MD, Hospital Virgen De La Concha - Complejo Asistencial De Zamora, Zamora; Segundo Rite Gracia, MD, Hospital Miguel Servet, Zaragoza; Mª Purificación Ventura Faci, MD, and Mª Pilar Samper Villagrasa, MD, Hospital Clínico Universitario Lozano Blesa, Zaragoza.

**SNQ (Swedish Neonatal Quality Register):** Jiri Kofron, MD, Södra Älvsborgs Sjukhus, Borås; Katarina Strand Brodd, MD, Mälarsjukhuset, Eskilstuna; Andreas Odlind, MD, Falu Lasarett, Falun; Lars Alberg, MD, Gällivare Sjukhus, Gällivare; Sofia Arwehed, MD, Gävle Sjukhus, Gävle; Ola Hafström, MD, SU/Östra, Göteborg; Anna Kasemo, MD, Länssjukhuset, Halmstad; Karin Nederman, MD, Helsingborgs Lasarett, Helsingborg; Lars Åhman, MD, Hudiksvalls Sjukhus, Hudiksvall; Fredrik Ingemarsson, MD, Länssjukhuset Ryhov, Jönköping; Henrik Petersson, MD, Länssjukhuset, Kalmar; Pernilla Thurn, MD, Blekingesjukhuset, Karlskrona; Eva Albinsson, MD, Centralsjukhuset, Karlstad; Bo Selander, MD, Centralsjukhuset, Kristianstad; Thomas Abrahamsson, MD, Universitetssjukhuset, Linköping; Ingela Heimdahl, MD, Sunderby sjukhus, Luleå; Kristbjorg Sveinsdottir, MD, Skånes Universitetssjukhus, Malmö/Lund; Erik Wejryd, MD, Vrinnevisjukhuset, Norrköping; Anna Hedlund, MD, Skellefteå Lasarett, Skellefteå; Maria Katarina Söderberg, MD, Kärnsjukhuset Skaraborg, Skövde; Boubou Hallberg, MD, Karolinska Sjukhuset, Stockholm; Thomas Brune, MD, Södersjuhuset, Stockholm; Jens Bäckström, MD, Länssjukhuset, Sundsvall; Johan Robinson, MD, Norra Älvsborgs Länssjukhus, Trollhättan; Aijaz Farooqi, MD, Norrlands Universitetssjukhus, Umeå; Erik Normann, MD, Akademiska Barnsjukhuset, Uppsala; Magnus Fredriksson, MD, Visby Lasarett, Visby; Anders Palm, MD, Västerviks Sjukhus, Västervik; Urban Rosenqvist, MD, Centrallasarettet, Västerås; Bengt Walde, MD, Centrallasarettet, Växjö; Cecilia Hagman, MD, Lasarettet, Ystad; Andreas Ohlin, MD, Universitetssjukhuset, Örebro; Rein Florell, MD, Örnsköldsviks Sjukhus, Örnsköldsvik; Agneta Smedsaas-Löfvenberg, MD, Östersunds Sjukhus, Östersund.

**Swiss NeoNet (Switzerland Neonatal Network):** Philipp Meyer, MD, and Claudia Anderegg, MD, Cantonal Hospital, Children's Clinic, Aarau; Sven Schulzke, MD, University Children's Hospital, Basel; Mathias Nelle, MD, University Hospital, Berne; Bendicht Wagner, MD, University Hospital, Berne; Thomas Riedel, MD, Children's Hospital, Chur; Grégoire Kaczala, MD, Cantonal Hospital, Fribourg; Riccardo E. Pfister, MD, University Hospital (HUG), Geneva; Jean-François Tolsa, MD, and Matthias Roth, MD, University Hospital (CHUV), Lausanne; Martin Stocker, MD, Children's Hospital, Lucerne; Bernhard Laubscher, MD, Cantonal Hospital, Neuchatel; Andreas Malzacher, MD, Cantonal Hospital, St. Gallen; John P. Micallef, MD, Children's Hospital, St. Gallen; Lukas Hegi, MD, Cantonal Hospital, Winterthur; Dirk Bassler, MD, and Romaine Arlettaz, MD, University Hospital (USZ), Zurich; Vera Bernet, MD, University Children's Hospital, Zurich.

**TIN Toscane on-line Network (Tuscan NN):** Carlo Dani, MD, Careggi University Hospital, Florence, Italy; Patrizio Fiorini, MD, Anna Meyer Children’s University Hospital, Florence, Italy; Antonio Boldrini, MD, University Hospital of Pisa, Pisa, Italy; Barbara Tomasini, MD, University Hospital of Siena, Siena, Italy.

**ILNN (Illinois Neonatal Network):** Preetha Prazad, MD, Advocate Children’s Hospital, Park Ridge, Illinois; Akihiko Noguchi, MD, SSM Cardinal Glennon/St. Mary’s Hospital, St. Louis MO; Kamlesh McWan, MD, Children’s Hospital of Illinois, Peoria, Illinois; Beau Button, MD, St John’s Hospital, Springfield, Illinois; William Stratton, MD, Carle Foundation Hospital, Urbana, Illinois; Aaron Hamvus, MD, Northwestern University Hospitals, Chicago, Illinois; Aarti Raghaven, MD, University Illinois Chicago Hospital, Chicago, Illinois; Matthew Derrick, MD, Evanston Northshore Hospital, Evanston, Illinois; Radley Hadley, MD, Advocate Illinois Masonic Hospital, Chicago, Illinois; Robert Covert, MD, Edward Hospital, Naperville, Illinois; Omar Lablanc, MD, John H. Stroger Cook County Hospital, Chicago, Illinois; Marc Weiss, MD, RMCH Loyola University Hospital, Maywood, Illinois; Anthony Bell, MD, Adventist Hinsdale Hospital, Hinsdale, Illinois; Maliha Shareef, MD, St. Alexius Hospital, Hoffman Estates, Illinois; Jean Silvestri, MD, Rush University Hospital, Chicago, Illinois.
